# Supplementary figures and images for: Sodium butyrate ameliorated diabetic nephropathy-associated tubulointerstitial inflammation by modulating the tight junctions of renal tubular epithelial cells
Source: Royal Society of Chemistry journal article supplement (doi:10.1039/d2fo00940d), 2022-07-29

Fig1

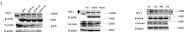

Fig2

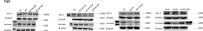

Fig3

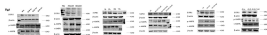

Fig4

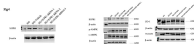

Fig5

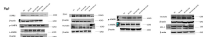

Supplement: d2fo00940d2.pdf [file d2fo00940d2.pdf]
